# Supplementary material for: Construction of a ternary MoO2/Ni/C hybrid towards lithium-ion batteries as a high-performance electrode
Source: Royal Society of Chemistry journal article supplement (doi:10.1039/d2nj01026g), 2022-01-01
Supplement: d2nj01026g1.pdf [file d2nj01026g1.pdf]

## Supporting Information

# Construction of a ternary MoO<sub>2</sub>/Ni/C hybrid towards lithium-ion batteries as high- performance electrode

*Jian Shen, Guangbin Duan\*, Xi Guo, Guangxu Yang, Li Li\*, Bingqiang Cao*

School of Materials Science and Engineering, University of Jinan, Jinan

250022, Shandong, China

\*Corresponding authors at: School of Materials Science and Engineering, University  
of Jinan, Jinan 250022, PR China.

Tel.: +86 531 82765473; fax: +86 531 87974453.

E-mail addresses: mse\_duangb@ujn.edu.cn(G. Duan), mse\_lil@ujn.edu.cn (L. Li)

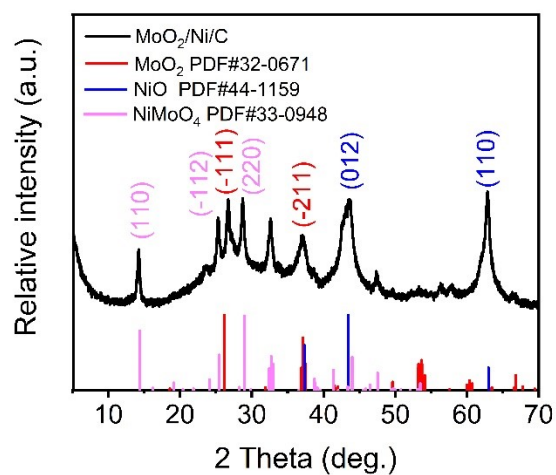

**Figure. S1.** XRD pattern of the MoO<sub>2</sub>/Ni composite.

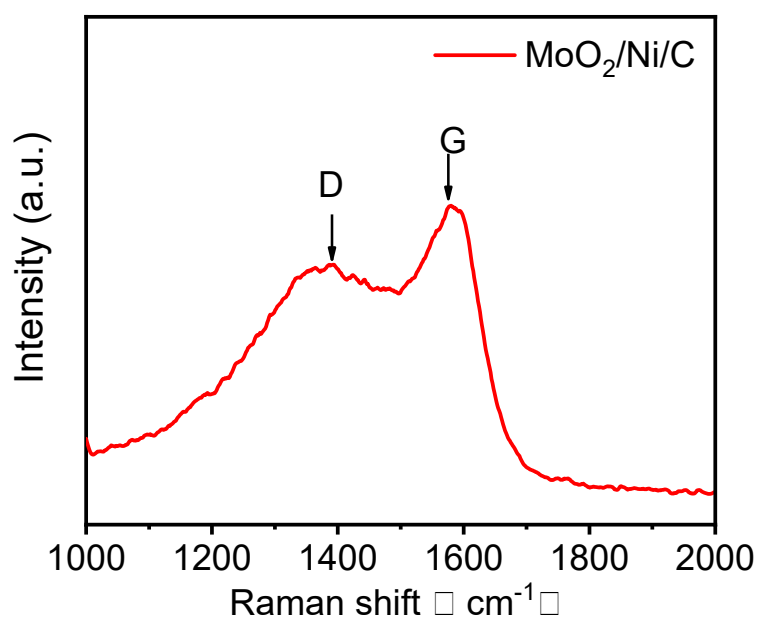

**Figure. S2.** Raman spectrum of MoO<sub>2</sub>/Ni/C composite.

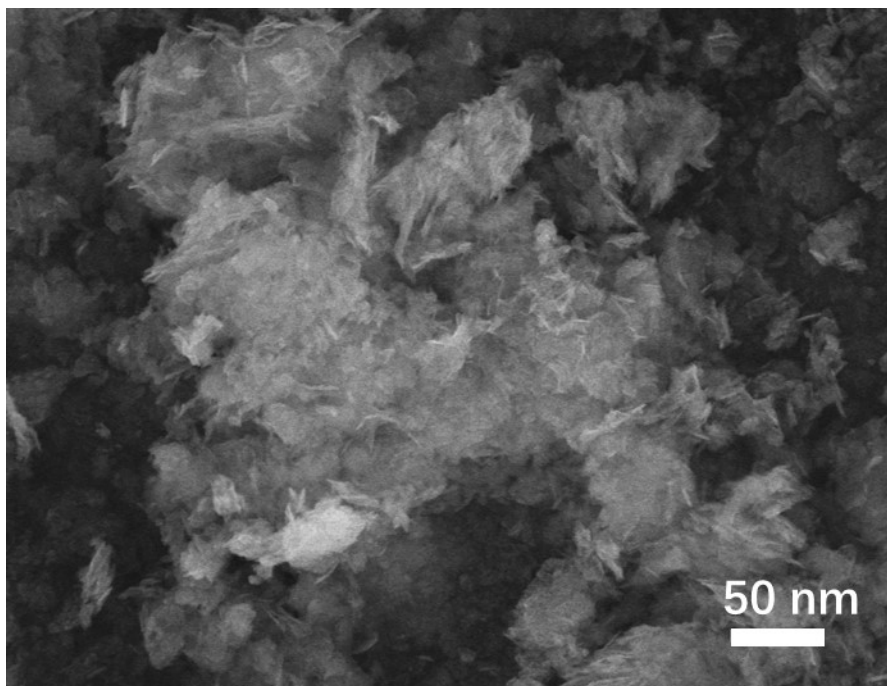

**Figure. S3.** SEM images of the synthesized MoO<sub>2</sub>/Ni composite.

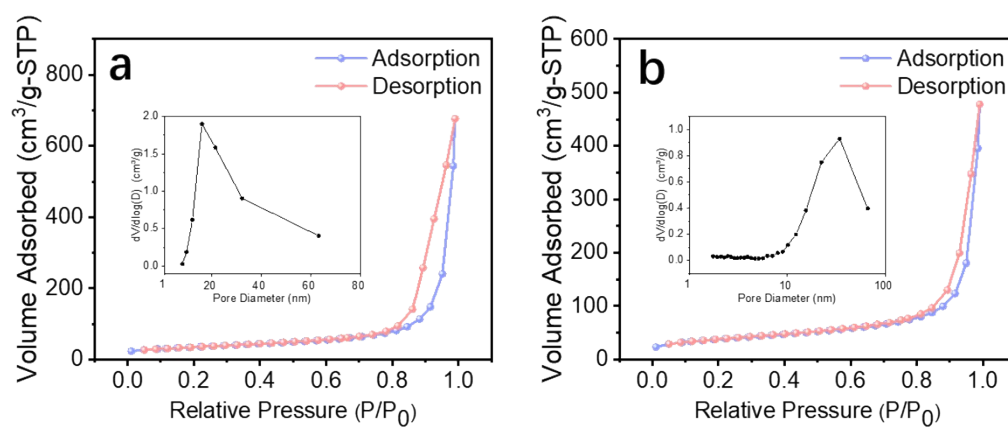

**Figure. S4.** N<sub>2</sub> adsorption-desorption isotherm and pore size distribution curves of (a) MoO<sub>2</sub>/Ni/C and (b) MoO<sub>2</sub>/Ni.

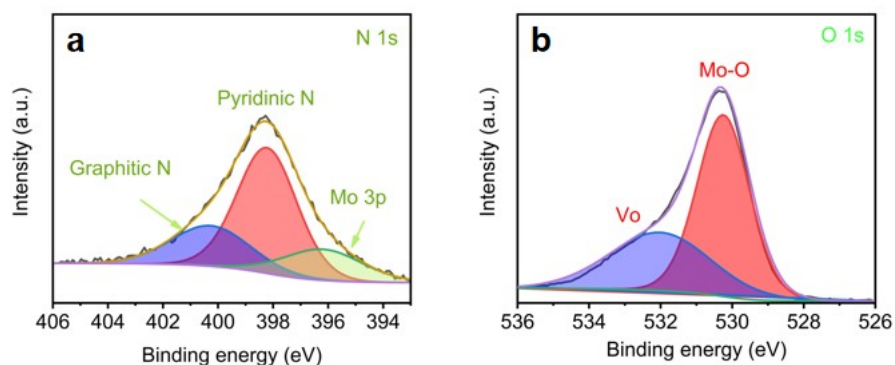

**Figure. S5.** High-resolution XPS spectra of (a) N 1s and (b) O 1s.

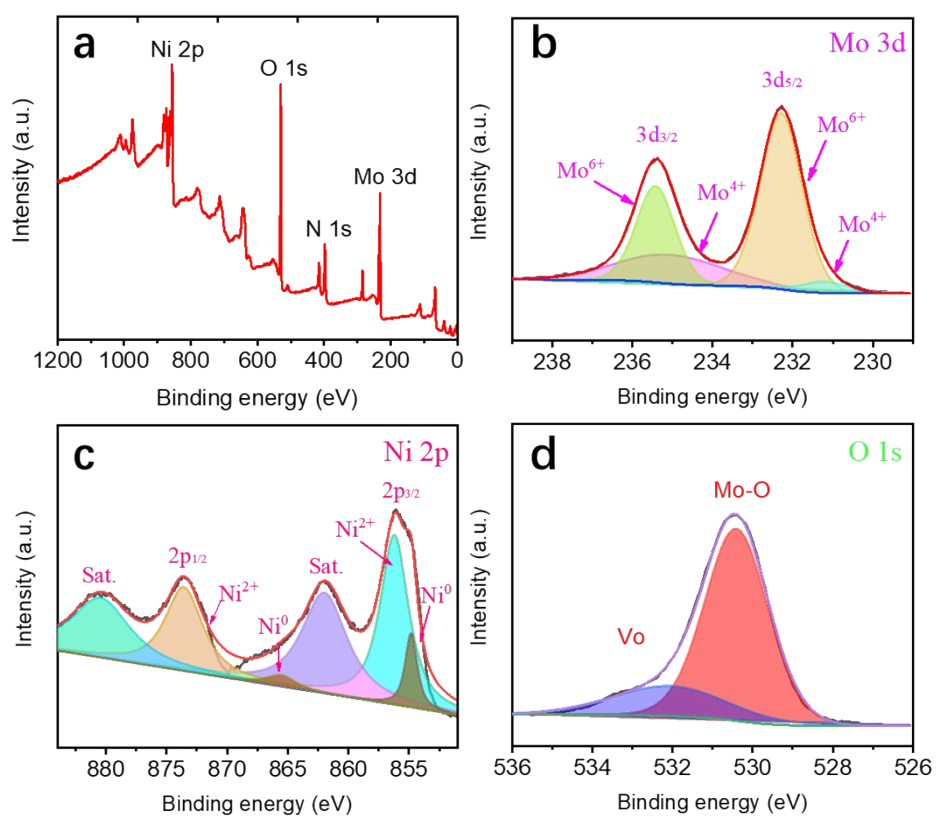

**Figure. S6.** (a) XPS survey scan of MoO<sub>2</sub>/Ni; high-resolution XPS spectra of (b) Mo 3d, (c) Ni 2p and (d) O 1s.

**Table. S1.** Comparison of electrochemical performance of MoO<sub>2</sub>-based electrodes prepared by different methods.

| Samples                                       | Method                                             | Initial Coulombic efficiency (%) | Cycle number | Current density (mA g <sup>-1</sup> ) | Capacity (mA hg <sup>-1</sup> ) | Ref.      |
|-----------------------------------------------|----------------------------------------------------|----------------------------------|--------------|---------------------------------------|---------------------------------|-----------|
| MoO <sub>2</sub> /Ni/C                        | Solution and annealing                             | 71.8                             | 200          | 200                                   | 807                             | This work |
| MoO <sub>2</sub> /ZnSe@N-C                    | selenization                                       | ~65.0                            | 100          | 100                                   | 807                             | 1         |
| MoO <sub>2</sub> NP@rGO                       | self-templating and calcination                    | ~60.0                            | 350          | 1000                                  | 641                             | 2         |
| (MoO <sub>3</sub> NRs/MoO <sub>2</sub> NPs)@C | Direct current (DC) arc-discharge plasma technique | 90.0                             | 100          | 100                                   | 840                             | 3         |
| 3D MoO <sub>2</sub> /NC                       | Solution and annealing                             | ~83.8                            | 250          | 100                                   | 912                             | 4         |
| CMAS-650                                      | Solution and annealing                             | 76.3                             | 100          | 500                                   | 916                             | 5         |
| MoO <sub>2</sub> -SnO <sub>2</sub> -C         | facial ball milling                                | 76.5                             | 100          | 1000                                  | 627.8                           | 6         |
| ZnO-MoO <sub>2</sub> /C                       | self-templating                                    | ~56.0                            | 150          | 100                                   | 860                             | 7         |
| MoO <sub>2</sub> /NC NPs                      | dual-annealing                                     | 84.1                             | 200          | 500                                   | 1017                            | 8         |
| porous MoO <sub>2</sub> /C hybrid microrods   | sol-gel method                                     | 52.6                             | 100          | 1000                                  | 374                             | 9         |

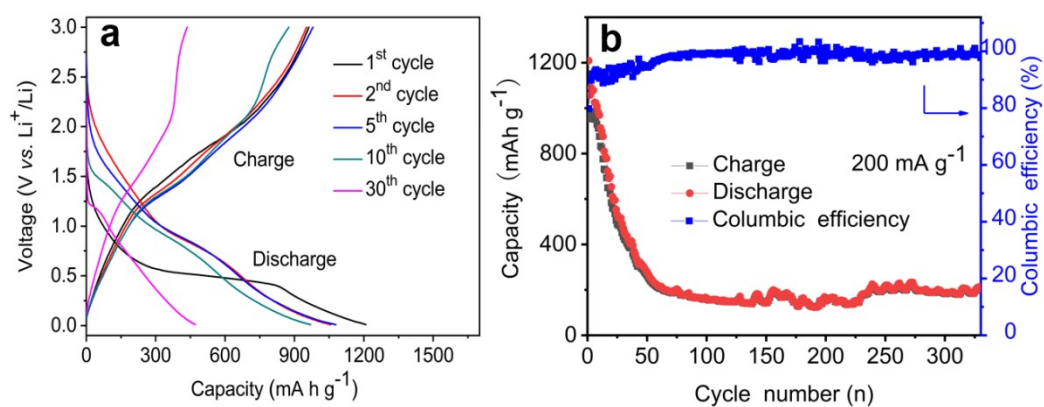

**Figure. S7.** Cycling performance of the  $\text{MoO}_2/\text{Ni}$  electrodes at  $200 \text{ mA g}^{-1}$

1.

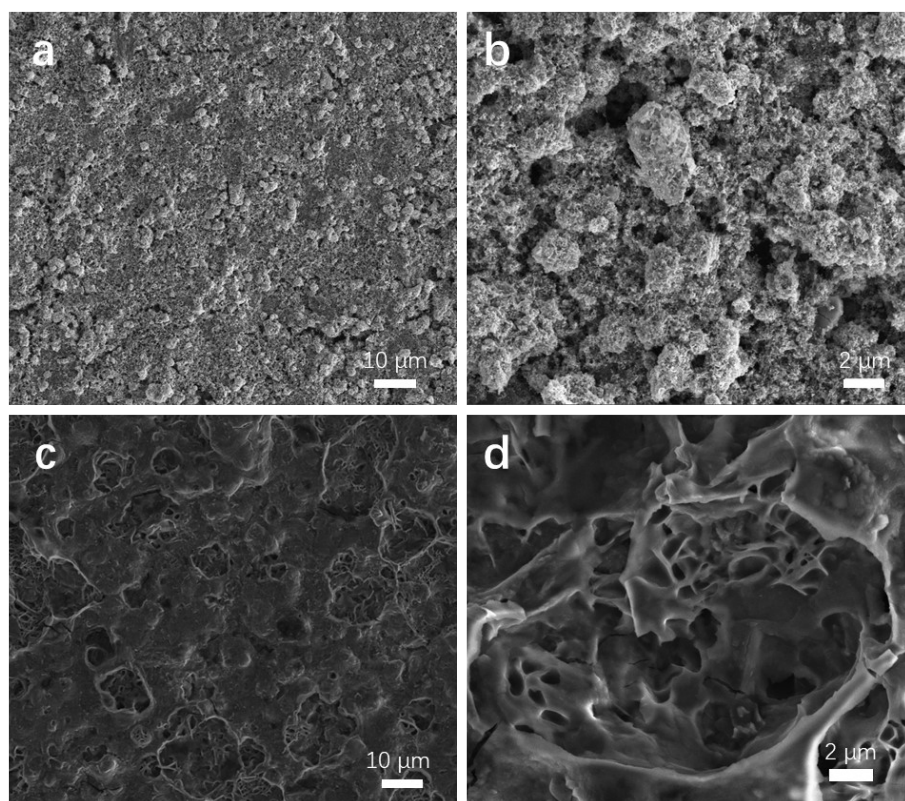

**Figure. S8.** The surface SEM images of the  $\text{MoO}_2/\text{Ni}/\text{C}$  (a-b) fresh and (c-d) after the 50th charge and discharge processes.

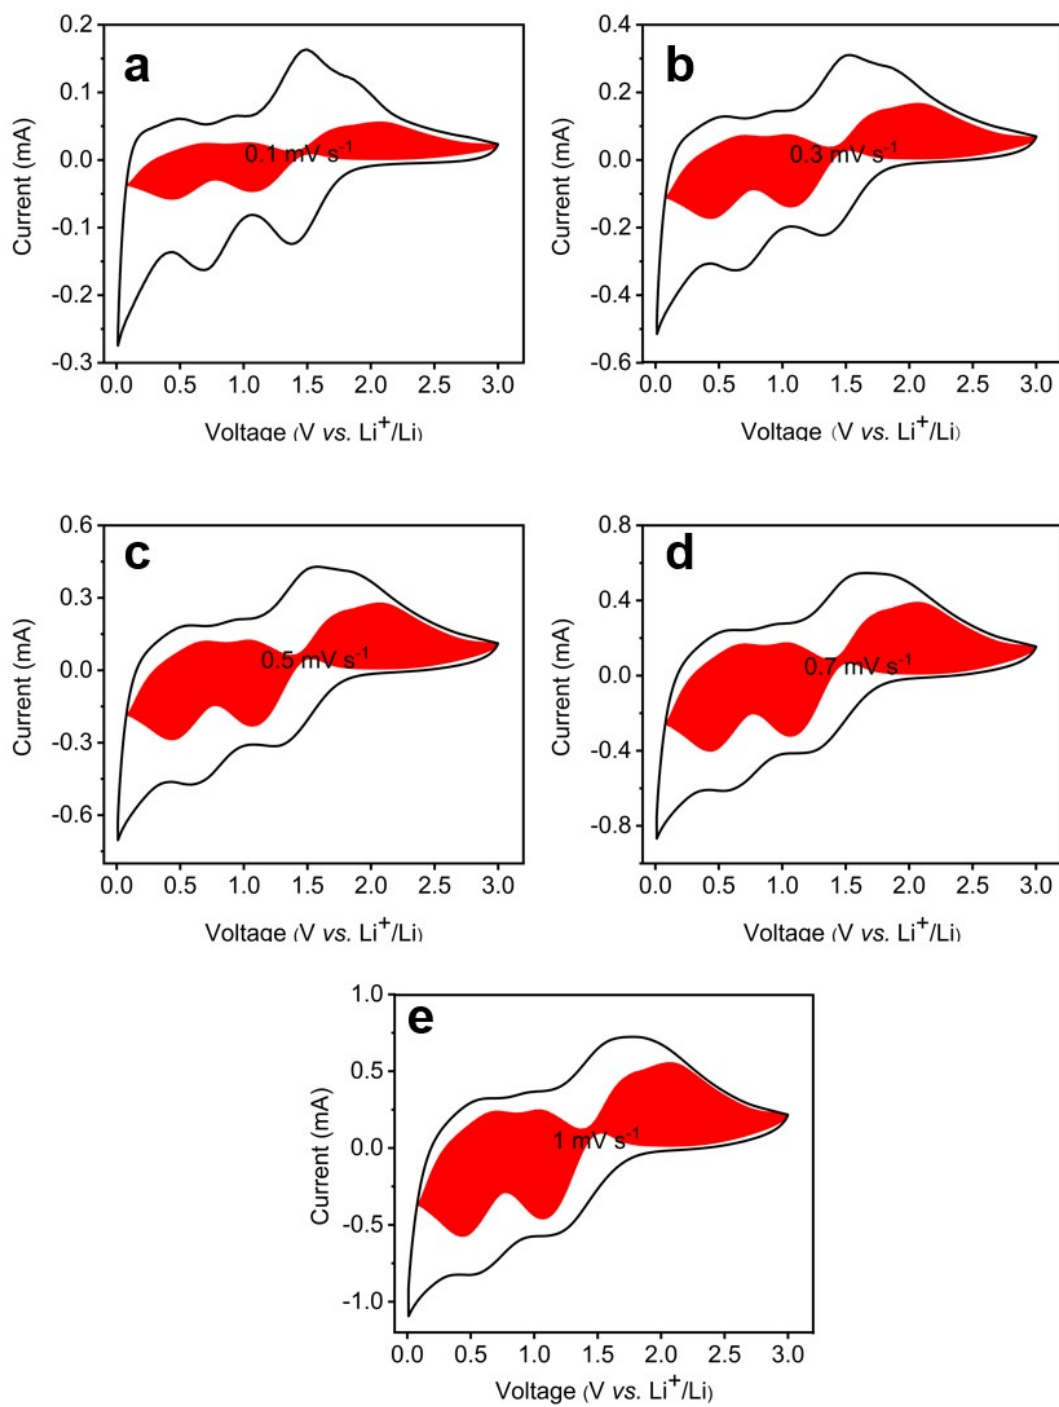

**Figure. S9.** CV profiles with shaded portion showing the capacitive contribution at 0.1, 0.3, 0.5, 0.7 and 1 mV s<sup>-1</sup>.

## References

- [1] M. Zhong, L.L. Li, K. Zhao, H. Peng, S.X. Xu, B.T. Su and D.H. Wang, Metal–OrganicFramework-Engaged Synthesis of Core–Shell MoO<sub>2</sub>/ZnSe@N-CNanorods as Anodes in High-Performance Lithium-Ion Batteries, *New J. Chem.* 2021, 45, 12064-12070.
- [2] Y.T. Chu, B.J. Xi and S.L. Xiong, One-Step Construction of MoO<sub>2</sub>Uniform Nanoparticles on Graphene with Enhanced Lithium Storage, *Chinese Chemical Letters*, 2021, 32(6), 1983-1987.
- [3] Z.G. Rong, C.F. Fang, Z.Y. Zhang, W.F. Miao, X.Y. Li, J.H. Liang, W.F. Yang, Y.N. Wang, X.N. Guo, Y.G. Jung and X.L. Dong, One-Step Synthesis of Carbon-Coated Monocrystal Molybdenum Oxides Nanocomposite as High-Capacity Anode Materials for Lithium-Ion Batteries, *Journal of Materiomics*, 2021, 7(3), 498-507.
- [4] H.J. Wang, X.Y. Jiang, Y.Y. Wang, X. Yang, Y.Q. Chai, Z.G. Yu, M.W. Xu and R. Yuan, Constructing 3D MoO<sub>2</sub>/N-doped Carbon Composites with Amorphous Nanowires and Crystalline Nanoparticles for High Li Storage Capacity, 2021, 377, 281-288.
- [5] C.L. Wang, L.S. Sun, B.B. Tian, Y. Cheng and L.M. Wang, Carbon Supported MoO<sub>2</sub> Spheres Boosting Ultra-Stable Lithium Storage with High Volumetric Density, *Energy Environ. Mater.*, 2021, <https://doi.org/10.1002/eem2.12157>.
- [6] Y.F. Feng, K.D. Wu, H.F. Dong, X.P. Huang, C. Bai, D.P. Xiong and M. He,



Exfoliated Graphite Nanosheets Wrapping on MoO<sub>2</sub>-SnO<sub>2</sub> Nanoparticles as A High Performance Anode Material for Lithium Ion Batteries, Journal of Power Sources, 2020, 467, 228357.

[7] J.B. Liu, Y.X. Fang, L.X. Zeng, J.X. Liu, L.H. Xu, J.L. Lou, B.Q. Huang, Q.R. Qian, M.D. Wei and Q.H. Chen, In Situ Fabrication of ZnO-MoO<sub>2</sub>/C Hetero-Phase Nanocomposite Derived from MOFs with Enhanced Performance for Lithium Storage, Journal of Alloys and Compounds, 2020, 817, 152728.

[8] P.L. Zhang, S.Z. Guo, J.Z. Liu, C.C. Zhou, S. Li, Y.Y. Yang, J. Wu and L.Y. Chen, Highly Uniform Nitrogen-Doped Carbon Decorated MoO<sub>2</sub> Nanopopcorns as Anode for High-Performance Lithium/Sodium-Ion Storage, Journal of Colloid and Interface Science, 2020, 563, 318-327

[9] J.H. Huo, Y.J. Xue, Y. Liu, Y.J. Ren and G.T. Yue, Polyvinyl Alcohol-Assisted Synthesis of Porous MoO<sub>2</sub>/C Microrods as Anodes for Lithium-Ion batteries, Journal of Electroanalytical Chemistry, 2020, 857, 113751.
